# Supplementary material for: Multi-Institutional, Multidisciplinary Study of the Impact of Course-Based Research Experiences
Source: PubMed Central journal article supplement — J Microbiol Biol Educ. 2017 Sep 1;18(2):18.2.44. doi: 10.1128/jmbe.v18i2.1317 (PMC5577972; doi:10.1128/jmbe.v18i2.1317), 2017-09-01
Supplement: JMBE-18-44-s001.pdf [file JMBE-18-44-s001.pdf]

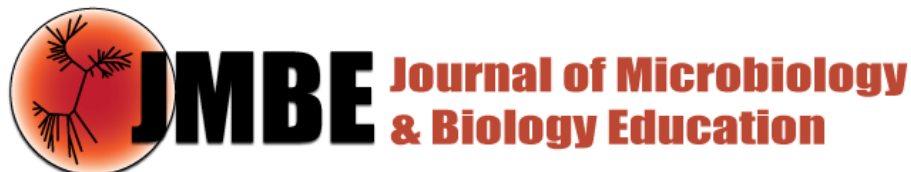

---

## Supplemental Materials

for

### Multi-Institutional, Multidisciplinary Study of the Impact of Course-Based Research Experiences

Catherine M. Mader<sup>1\*</sup>, Christopher W. Beck<sup>2</sup>, Wendy H. Grillo<sup>3</sup>, Gail P. Hollowell<sup>3</sup>,  
Bettye S. Hennington<sup>4</sup>, Nancy L. Staub<sup>5</sup>, Veronique A. Delesalle<sup>6</sup>, Denise Lello<sup>7</sup>, Robert B.  
Merritt<sup>7</sup>, Gerald D. Griffin<sup>8,10</sup>, Chastity Bradford<sup>8</sup>, Jinghe Mao<sup>4</sup>, Lawrence S. Blumer<sup>9</sup>, and  
Sandra L. White<sup>11</sup>

<sup>1</sup>Department of Physics, Hope College, Holland, MI 49423, <sup>2</sup>Department of Biology, Emory University, Atlanta, GA 30322, <sup>3</sup>Department of Biology, North Carolina Central University, Durham, NC 27707, <sup>4</sup>Department of Biology, Tougaloo College, Tougaloo, MS 39174, <sup>5</sup>Biology Department, Gonzaga University, Spokane, WA 99258, <sup>6</sup>Department of Biology, Gettysburg College, Gettysburg, PA 17325, <sup>7</sup>Department of Biological Sciences, Smith College, Northampton, MA 01063, <sup>8</sup>Department of Biology, Tuskegee University, Tuskegee Institute, AL 36088, <sup>9</sup>Department of Biology, Morehouse College, Atlanta, GA 30314, <sup>10</sup>Department of Biology, Hope College, Holland, MI 49423, <sup>11</sup>Center for Science, Math and Technology Education, North Carolina Central University, Durham, NC 27707

## Table of Contents

(Total pages 8)

- Appendix 1: Survey of collaboration CRE developers/instructors on course elements
- Appendix 2: Student self-reported benefits from CURE and SURE survey results
- Appendix 3: Student self-reported benefits based on whether the CRE was a full-course experience or a module within a course
- Appendix 4: Student self-reported benefits based on module type
- Appendix 5: Faculty reported emphasis of course elements based on cluster elements
- Appendix 6: Student self-reported benefits for courses that are “Low/moderate novelty and student design” or “High novelty and student design”

\*Corresponding author. Mailing address: Department of Physics,  
Hope College, Holland MI 49423. Phone: 616-395-7114. Fax:  
616-395-7123. E-mail: [mader@hope.edu](mailto:mader@hope.edu).  
Received: 8 March 2017, Accepted: 13 June 2017, Published:  
1 September 2017.

©2017 Author(s). Published by the American Society for Microbiology. This is an Open Access article distributed under the terms of the Creative Commons Attribution-Noncommercial-NoDerivatives 4.0 International license (<https://creativecommons.org/licenses/by-nc-nd/4.0/>) and <https://creativecommons.org/licenses/by-nc-nd/4.0/legalcode>, which grants the public the nonexclusive right to copy, distribute, or display the published work.

**Appendix 1:** Survey of collaboration CRE developers/instructors on course elements.

**Supplemental Table I:** Collaboration CRE Developers/Instructors were asked “Read each item and indicate how much relative emphasis (time on task) is placed on each element in this course.”

| Read each item and indicate how much relative emphasis (time on task) is placed on each element in this course. | Not applicable | No emphasis | Little emphasis | Some emphasis | Much emphasis | Extensive emphasis |
|-----------------------------------------------------------------------------------------------------------------|----------------|-------------|-----------------|---------------|---------------|--------------------|
| A scripted lab or project in which the students know the expected outcome                                       |                |             |                 |               |               |                    |
| A lab or project in which only the instructor knows the outcome                                                 |                |             |                 |               |               |                    |
| A lab or project where no one knows the outcome                                                                 |                |             |                 |               |               |                    |
| At least one project that is assigned and structured by the instructor                                          |                |             |                 |               |               |                    |
| A project in which the students have some input into the research process and/or what is being studied          |                |             |                 |               |               |                    |
| A project entirely of student's own design                                                                      |                |             |                 |               |               |                    |
| Work individually                                                                                               |                |             |                 |               |               |                    |
| Work together as a whole class                                                                                  |                |             |                 |               |               |                    |
| Work in small groups                                                                                            |                |             |                 |               |               |                    |
| Become responsible for a part of the project                                                                    |                |             |                 |               |               |                    |
| Read primary scientific literature                                                                              |                |             |                 |               |               |                    |
| Write a research proposal                                                                                       |                |             |                 |               |               |                    |
| Collect data                                                                                                    |                |             |                 |               |               |                    |
| Analyze data                                                                                                    |                |             |                 |               |               |                    |
| Present results orally                                                                                          |                |             |                 |               |               |                    |
| Present the results in written papers or reports                                                                |                |             |                 |               |               |                    |
| Present posters                                                                                                 |                |             |                 |               |               |                    |
| Critique the work of other students                                                                             |                |             |                 |               |               |                    |
| Listen to lectures                                                                                              |                |             |                 |               |               |                    |
| Read a textbook                                                                                                 |                |             |                 |               |               |                    |
| Work on problem sets                                                                                            |                |             |                 |               |               |                    |
| Take tests in class                                                                                             |                |             |                 |               |               |                    |
| Discuss reading materials in class                                                                              |                |             |                 |               |               |                    |
| Maintain lab notebooks                                                                                          |                |             |                 |               |               |                    |
| Computer modeling                                                                                               |                |             |                 |               |               |                    |

**Appendix 2:** Student self-reported benefits from CURE and SURE survey results.

**Supplemental Table II:** The Collaboration mean and standard deviations represent the average of 49 different course averages from collaboration CREs. The National SURE mean and standard deviations are for the summer 2014 averages.

|                                                                         | Collaboration |      | SURE   |      | Effect size |
|-------------------------------------------------------------------------|---------------|------|--------|------|-------------|
|                                                                         | n=49          |      | n≥3041 |      |             |
|                                                                         | Mean          | SD   | Mean   | SD   |             |
| <b>Understanding</b>                                                    |               |      |        |      |             |
| 5. Understanding how knowledge is constructed                           | 3.70          | 0.50 | 3.62   | 0.99 | 0.08        |
| 6. Understanding the research process                                   | 3.83          | 0.51 | 3.89   | 0.95 | -0.06       |
| 8. Understanding how scientists work on real problems                   | 3.95          | 0.46 | 3.82   | 0.97 | 0.13        |
| 9. Understanding that scientific assertions require supporting evidence | 3.87          | 0.51 | 3.59   | 1.13 | 0.25        |
| 11. Understanding science                                               | 3.89          | 0.51 | 3.58   | 1.07 | 0.29        |
| 12. Learning ethical conduct                                            | 3.45          | 0.61 | 3.28   | 1.20 | 0.15        |
| 18. Understanding how scientists think                                  | 3.73          | 0.52 | 3.55   | 1.04 | 0.18        |
| <b>Skills and Abilities</b>                                             |               |      |        |      |             |
| 2. Skill in interpretation of results                                   | 3.83          | 0.43 | 3.69   | 0.95 | 0.14        |
| 7. Ability to integrate theory and practice                             | 3.69          | 0.52 | 3.61   | 1.00 | 0.08        |
| 10. Ability to analyze data and other information                       | 4.02          | 0.46 | 3.72   | 1.00 | 0.30        |
| 13. Learning laboratory techniques                                      | 4.10          | 0.65 | 3.78   | 1.22 | 0.26        |
| 14. Ability to read and understand primary literature                   | 3.76          | 0.66 | 3.58   | 1.12 | 0.16        |
| 15. Skill in how to give an effective oral presentation                 | 3.42          | 0.59 | 3.43   | 1.19 | -0.01       |
| 16. Skill in science writing                                            | 3.70          | 0.64 | 3.27   | 1.18 | 0.36        |
| <b>Development</b>                                                      |               |      |        |      |             |
| 1. Clarification of a career path                                       | 3.37          | 0.63 | 3.32   | 1.13 | 0.05        |
| 3. Tolerance for obstacles faced in the research process                | 3.85          | 0.51 | 3.84   | 0.94 | 0.01        |
| 4. Readiness for more demanding research                                | 3.78          | 0.55 | 3.78   | 0.93 | 0.00        |
| 17. Self-confidence                                                     | 3.56          | 0.61 | 3.51   | 1.12 | 0.05        |
| 19. Learning to work independently                                      | 3.60          | 0.59 | 3.69   | 1.10 | -0.08       |
| 20. Becoming a part of a learning community                             | 3.77          | 0.48 | 3.61   | 1.10 | 0.15        |

**Appendix 3:** Student self-reported benefits based on whether the CRE was a full-course experience or a module within a course.

**Supplemental Table III:** The number of each type of CRE is indicated under each type. Means, standard errors and effect sizes are shown for full courses, and all modules.

|                                                                         | Full Course |         | Module |      | Effect Size (P-value) | SURE   |
|-------------------------------------------------------------------------|-------------|---------|--------|------|-----------------------|--------|
|                                                                         | Mean        | Std Err | Mean   | Mean |                       | Mean   |
|                                                                         | n=23        |         | n=26   |      |                       | n≥3041 |
| <b>Understanding</b>                                                    |             |         |        |      |                       |        |
| 5. Understanding how knowledge is constructed                           | 4.00        | 0.08    | 3.44   | 0.08 | 1.34 (<0.001)         | 3.62   |
| 6. Understanding the research process                                   | 4.17        | 0.08    | 3.53   | 0.08 | 1.60 (<0.001)         | 3.89   |
| 8. Understanding how scientists work on real problems                   | 4.22        | 0.08    | 3.71   | 0.08 | 1.31 (<0.001)         | 3.82   |
| 9. Understanding that scientific assertions require supporting evidence | 4.12        | 0.10    | 3.66   | 0.09 | 1.00 (<0.001)         | 3.59   |
| 11. Understanding science                                               | 4.19        | 0.08    | 3.63   | 0.09 | 1.31 (<0.001)         | 3.58   |
| 12. Learning ethical conduct                                            | 3.63        | 0.12    | 3.30   | 0.11 | 0.57 (0.01)           | 3.28   |
| 18. Understanding how scientists think                                  | 4.02        | 0.08    | 3.48   | 0.10 | 1.20 (<0.001)         | 3.55   |
| <b>Skills and Abilities</b>                                             |             |         |        |      |                       |        |
| 2. Skill in interpretation of results                                   | 4.10        | 0.07    | 3.59   | 0.07 | 1.45 (<0.001)         | 3.69   |
| 7. Ability to integrate theory and practice                             | 3.96        | 0.10    | 3.45   | 0.09 | 1.09 (<0.001)         | 3.61   |
| 10. Ability to analyze data and other information                       | 4.30        | 0.08    | 3.77   | 0.08 | 1.40 (<0.001)         | 3.72   |
| 13. Learning laboratory techniques                                      | 4.44        | 0.07    | 3.80   | 0.14 | 1.12 (<0.001)         | 3.78   |
| 14. Ability to read and understand primary literature                   | 4.23        | 0.08    | 3.35   | 0.11 | 1.82 (<0.001)         | 3.58   |
| 15. Skill in how to give an effective oral presentation                 | 3.68        | 0.12    | 3.19   | 0.10 | 0.91 (0.003)          | 3.43   |
| 16. Skill in science writing                                            | 4.02        | 0.13    | 3.41   | 0.10 | 1.08 (<0.001)         | 3.27   |
| <b>Development</b>                                                      |             |         |        |      |                       |        |
| 1. Clarification of a career path                                       | 3.59        | 0.14    | 3.18   | 0.11 | 0.67 (0.006)          | 3.32   |
| 3. Tolerance for obstacles faced in the research process                | 4.17        | 0.08    | 3.57   | 0.09 | 1.48 (<0.001)         | 3.84   |
| 4. Readiness for more demanding research                                | 4.18        | 0.08    | 3.44   | 0.08 | 1.83 (<0.001)         | 3.78   |
| 17. Self-confidence                                                     | 3.85        | 0.11    | 3.31   | 0.11 | 1.00 (<0.001)         | 3.51   |
| 19. Learning to work independently                                      | 3.88        | 0.11    | 3.34   | 0.10 | 1.02 (<0.001)         | 3.69   |
| 20. Becoming a part of a learning community                             | 4.06        | 0.08    | 3.51   | 0.08 | 1.38 (<0.001)         | 3.61   |

**Appendix 4:** Student self-reported benefits based on module type.

**Supplemental Table IV:** Means, standard errors and effect sizes are shown for full courses, and the three module types (sequence, interlude and interwoven). The number of each type of CRE is reported under the labels.

| Benefits                                                                | full        |         | sequence    |         | interlude  |         | interwoven |         | effect sizes (P values) |                   |                    |                       |                        |                         |
|-------------------------------------------------------------------------|-------------|---------|-------------|---------|------------|---------|------------|---------|-------------------------|-------------------|--------------------|-----------------------|------------------------|-------------------------|
|                                                                         | Mean        | Std Err | Mean        | Std Err | Mean       | Std Err | Mean       | Std Err | Full vs sequence        | Full vs interlude | Full vs interwoven | Sequence vs interlude | Sequence vs interwoven | Interlude vs interwoven |
| <b>Understanding</b>                                                    | <b>n=23</b> |         | <b>n=17</b> |         | <b>n=6</b> |         | <b>n=3</b> |         |                         |                   |                    |                       |                        |                         |
| 5. Understanding how knowledge is constructed                           | 4.00        | 0.08    | 3.55        | 0.09    | 3.04       | 0.21    | 3.58       | 0.08    | 1.16<br>(<0.001)        | 2.46<br>(<0.001)  | 1.07<br>(0.083)    | 1.29<br>(0.045)       | -0.09<br>(0.414)       | -1.22<br>(0.021)        |
| 6. Understanding the research process                                   | 4.17        | 0.08    | 3.62        | 0.08    | 3.18       | 0.21    | 3.77       | 0.15    | 1.54<br>(<0.001)        | 2.7<br>(<0.001)   | 1.07<br>(0.063)    | 1.16<br>(0.063)       | -0.49<br>(0.204)       | -1.31<br>(0.008)        |
| 8. Understanding how scientists work on real problems                   | 4.22        | 0.08    | 3.76        | 0.08    | 3.37       | 0.15    | 4.11       | 0.24    | 1.3<br>(<0.001)         | 2.55<br>(<0.001)  | 0.28<br>(0.647)    | 1.17<br>(0.168)       | -1.05<br>(0.009)       | -1.9<br>(<0.001)        |
| 9. Understanding that scientific assertions require supporting evidence | 4.12        | 0.10    | 3.73        | 0.11    | 3.34       | 0.17    | 3.87       | 0.08    | 0.83<br>(0.004)         | 1.74<br>(<0.001)  | 0.53<br>(0.458)    | 0.88<br>(0.299)       | -0.33<br>(0.217)       | -1.51<br>(0.048)        |
| 11. Understanding science                                               | 4.19        | 0.08    | 3.72        | 0.09    | 3.25       | 0.23    | 3.90       | 0.13    | 1.21<br>(<0.001)        | 2.26<br>(<0.001)  | 0.75<br>(0.29)     | 1.11<br>(0.076)       | -0.5<br>(0.161)        | -1.37<br>(0.008)        |
| 12. Learning ethical conduct                                            | 3.63        | 0.12    | 3.39        | 0.13    | 2.82       | 0.23    | 3.75       | 0.06    | 0.43<br>(0.032)         | 1.49<br>(<0.001)  | -0.21<br>(0.688)   | 1.04<br>(0.262)       | -0.71<br>(0.081)       | -1.99<br>(0.011)        |
| 18. Understanding how scientists think                                  | 4.02        | 0.08    | 3.54        | 0.12    | 3.14       | 0.17    | 3.82       | 0.26    | 1.1<br>(<0.001)         | 1.89<br>(<0.001)  | 0.49<br>(0.504)    | 0.86<br>(0.281)       | -0.59<br>(0.071)       | -1.59<br>(0.013)        |
| <b>Skills and Abilities</b>                                             |             |         |             |         |            |         |            |         |                         |                   |                    |                       |                        |                         |
| 2. Skill in interpretation of results                                   | 4.10        | 0.07    | 3.68        | 0.08    | 3.22       | 0.15    | 3.80       | 0.02    | 1.29<br>(<0.001)        | 2.7<br>(<0.001)   | 0.91<br>(0.143)    | 1.39<br>(0.01)        | -0.43<br>(0.358)       | -1.87<br>(0.007)        |
| 7. Ability to integrate theory and practice                             | 3.96        | 0.10    | 3.55        | 0.08    | 3.04       | 0.22    | 3.73       | 0.20    | 0.95<br>(0.005)         | 2.43<br>(<0.001)  | 0.48<br>(0.444)    | 1.32<br>(0.049)       | -0.53<br>(0.263)       | -1.41<br>(0.013)        |
| 10. Ability to analyze data and other information                       | 4.30        | 0.08    | 3.89        | 0.09    | 3.43       | 0.14    | 3.75       | 0.03    | 1.11<br>(0.001)         | 2.32<br>(<0.001)  | 1.59<br>(0.015)    | 1.24<br>(0.041)       | 0.39<br>(0.922)        | -1.09<br>(0.140)        |
| 13. Learning laboratory techniques                                      | 4.44        | 0.07    | 3.95        | 0.16    | 3.32       | 0.36    | 3.92       | 0.11    | 0.97<br>(<0.001)        | 1.58<br>(<0.001)  | 1.64<br>(0.082)    | 0.88<br>(0.111)       | 0.06<br>(0.385)        | -0.79<br>(0.034)        |
| 14. Ability to read and understand primary literature                   | 4.23        | 0.08    | 3.52        | 0.12    | 2.86       | 0.24    | 3.34       | 0.08    | 1.61<br>(<0.001)        | 2.62<br>(<0.001)  | 2.41<br>(0.001)    | 1.26<br>(0.018)       | 0.38<br>(0.895)        | -0.95<br>(0.073)        |
| 15. Skill in how to give an effective oral presentation                 | 3.68        | 0.12    | 3.21        | 0.12    | 2.91       | 0.21    | 3.62       | 0.12    | 0.87<br>(0.014)         | 1.49<br>(0.002)   | 0.11<br>(0.915)    | 0.58<br>(0.322)       | -0.84<br>(0.151)       | -1.56<br>(0.038)        |
| 16. Skill in science writing                                            | 4.02        | 0.13    | 3.50        | 0.12    | 3.16       | 0.25    | 3.39       | 0.10    | 0.9<br>(0.015)          | 1.69<br>(0.001)   | 1.04<br>(0.062)    | 0.66<br>(0.315)       | 0.25<br>(0.887)        | -0.43<br>(0.513)        |

**Table IV (cont.)**

|                                                          | full |         | sequence |         | interlude |         | interwoven |         | effect sizes (P values) |                   |                    |                       |                        |                         |  |
|----------------------------------------------------------|------|---------|----------|---------|-----------|---------|------------|---------|-------------------------|-------------------|--------------------|-----------------------|------------------------|-------------------------|--|
|                                                          | Mean | Std Err | Mean     | Std Err | Mean      | Std Err | Mean       | Std Err | Full vs sequence        | Full vs interlude | Full vs interwoven | Sequence vs interlude | Sequence vs interwoven | Interlude vs interwoven |  |
| <b>Benefits</b>                                          |      |         |          |         |           |         |            |         |                         |                   |                    |                       |                        |                         |  |
| <b>Development</b>                                       | n=23 |         | n=17     |         | n=6       |         | n=3        |         |                         |                   |                    |                       |                        |                         |  |
| 1. Clarification of a career path                        | 3.59 | 0.14    | 3.30     | 0.11    | 2.61      | 0.18    | 3.68       | 0.16    | 0.5<br>(0.019)          | 2.22<br>(<0.001)  | -0.14<br>(0.366)   | 1.56<br>(0.119)       | -0.9<br>(0.021)        | -2.62<br>(0.001)        |  |
| 3. Tolerance for obstacles faced in the research process | 4.17 | 0.08    | 3.63     | 0.07    | 3.23      | 0.28    | 3.89       | 0.14    | 1.6<br>(<0.001)         | 2.4<br>(<0.001)   | 0.77<br>(0.355)    | 0.95<br>(0.109)       | -0.93<br>(0.051)       | -1.13<br>(0.002)        |  |
| 4. Readiness for more demanding research                 | 4.18 | 0.08    | 3.50     | 0.07    | 3.12      | 0.23    | 3.72       | 0.11    | 1.84<br>(<0.001)        | 2.9<br>(<0.001)   | 1.16<br>(0.068)    | 1.01<br>(0.156)       | -0.75<br>(0.122)       | -1.25<br>(0.012)        |  |
| 17. Self-confidence                                      | 3.85 | 0.11    | 3.40     | 0.10    | 2.80      | 0.32    | 3.77       | 0.16    | 0.96<br>(0.002)         | 2.07<br>(<0.001)  | 0.17<br>(0.835)    | 1.13<br>(0.08)        | -0.91<br>(0.078)       | -1.42<br>(0.003)        |  |
| 19. Learning to work independently                       | 3.88 | 0.11    | 3.36     | 0.14    | 3.09      | 0.17    | 3.75       | 0.08    | 0.95<br>(<0.001)        | 1.46<br>(0.001)   | 0.26<br>(0.742)    | 0.5<br>(0.947)        | -0.72<br>(0.029)       | -1.87<br>(0.030)        |  |
| 20. Becoming a part of a learning community              | 4.06 | 0.08    | 3.58     | 0.09    | 3.16      | 0.21    | 3.84       | 0.01    | 1.33<br>(<0.001)        | 2.26<br>(<0.001)  | 0.65<br>(0.292)    | 1.02<br>(0.138)       | -0.74<br>(0.069)       | -1.56<br>(0.005)        |  |

**Appendix 5:** Faculty reported emphasis of course elements based on cluster elements.

**Supplemental Table V:** Clusters are defined based on the dendrogram in Figure 1. Means and standard errors for reported for each cluster. The number of courses in each cluster is reported for each cluster.

| Course Elements                                            | Low/moderate novelty and student design |           | High novelty and student design |           | Effect Size (P value) |
|------------------------------------------------------------|-----------------------------------------|-----------|---------------------------------|-----------|-----------------------|
|                                                            | N=39                                    |           | N=9                             |           |                       |
|                                                            | Mean                                    | Std Error | Mean                            | Std Error |                       |
| Scripted lab or project where students know outcome        | 2.05                                    | 0.23      | 1.00                            | 0.17      | -0.80 (0.01)          |
| Lab or project where only instructor knows outcome         | 2.28                                    | 0.19      | 1.67                            | 0.33      | -0.54 (0.177)         |
| Lab or project where no one knows the outcome              | 3.46                                    | 0.22      | 4.78                            | 0.15      | 1.06 (0.002)          |
| At least one project assigned and structured by instructor | 3.18                                    | 0.24      | 1.67                            | 0.33      | -1.06 (0.002)         |
| A project where students have input into process or topic  | 2.87                                    | 0.25      | 4.78                            | 0.15      | 1.32 (<0.001)         |
| A project entirely of student design                       | 1.74                                    | 0.22      | 3.89                            | 0.31      | 1.67 (<0.001)         |
| Work individually                                          | 2.95                                    | 0.22      | 2.89                            | 0.45      | -0.04 (0.903)         |
| Work as a whole class                                      | 2.90                                    | 0.21      | 3.11                            | 0.56      | 0.15 (0.607)          |
| Work in small groups                                       | 4.36                                    | 0.10      | 4.11                            | 0.42      | -0.32 (0.275)         |
| Become responsible for a part of the project               | 4.49                                    | 0.08      | 5.00                            | 0.00      | 1.18 (0.001)          |
| Read primary scientific literature                         | 2.87                                    | 0.27      | 3.56                            | 0.50      | 0.42 (0.011)          |
| Write a research proposal                                  | 0.90                                    | 0.18      | 4.22                            | 0.28      | 3.15 (<0.001)         |
| Collect data                                               | 4.41                                    | 0.10      | 4.78                            | 0.15      | 0.62 (0.052)          |
| Analyze data                                               | 4.59                                    | 0.08      | 4.78                            | 0.15      | 0.38 (0.355)          |
| Present results orally                                     | 3.49                                    | 0.22      | 3.44                            | 0.71      | -0.03 (0.971)         |
| Present results in written papers or reports               | 3.31                                    | 0.19      | 3.11                            | 0.72      | -0.14 (0.581)         |
| Present posters                                            | 1.33                                    | 0.23      | 2.44                            | 0.82      | 0.66 (0.014)          |
| Critique work of other students                            | 1.77                                    | 0.22      | 3.78                            | 0.57      | 1.41 (<0.001)         |
| Discuss reading materials in class                         | 2.87                                    | 0.20      | 3.33                            | 0.33      | 0.39 (0.363)          |
| Maintain lab notebook                                      | 3.18                                    | 0.30      | 4.22                            | 0.15      | 0.61 (0.001)          |
| Computer modelling                                         | 1.05                                    | 0.16      | 1.11                            | 0.39      | 0.06 (0.917)          |

**Appendix 6:** Student self-reported benefits for courses that are “Low/moderate novelty and student design” or “High novelty and student design.”

**Supplemental Table VI:** Means and standard errors for each item are shown. For all benefits except Oral Presentation, courses in “High novelty and student design” resulted in significantly higher benefits than courses in “Low/moderate novelty and student design.”

|                                                                         | Low/moderate novelty and student design |           | High novelty and student design |           | Effect Size (P value) | SURE |
|-------------------------------------------------------------------------|-----------------------------------------|-----------|---------------------------------|-----------|-----------------------|------|
|                                                                         | N=39                                    |           | N=9                             |           |                       |      |
|                                                                         | Mean                                    | Std Error | Mean                            | Std Error |                       |      |
| <b>Understanding</b>                                                    |                                         |           |                                 |           |                       |      |
| 5. Understanding how knowledge is constructed                           | 3.65                                    | 0.08      | 4.03                            | 0.1       | 0.81 (0.008)          | 3.62 |
| 6. Understanding the research process                                   | 3.77                                    | 0.08      | 4.19                            | 0.12      | 0.91 (0.002)          | 3.89 |
| 8. Understanding how scientists work on real problems                   | 3.88                                    | 0.07      | 4.34                            | 0.08      | 1.13 (0.002)          | 3.82 |
| 9. Understanding that scientific assertions require supporting evidence | 3.8                                     | 0.08      | 4.3                             | 0.07      | 1.08 (<0.001)         | 3.59 |
| 11. Understanding science                                               | 3.85                                    | 0.08      | 4.23                            | 0.08      | 0.85 (0.003)          | 3.58 |
| 12. Learning ethical conduct                                            | 3.39                                    | 0.09      | 3.9                             | 0.08      | 0.94 (<0.001)         | 3.28 |
| 18. Understanding how scientists think                                  | 3.66                                    | 0.08      | 4.17                            | 0.09      | 1.09 (0.001)          | 3.55 |
| <b>Skills and Abilities</b>                                             |                                         |           |                                 |           |                       |      |
| 2. Skill in interpretation of results                                   | 3.76                                    | 0.06      | 4.21                            | 0.1       | 1.17 (0.001)          | 3.69 |
| 7. Ability to integrate theory and practice                             | 3.62                                    | 0.08      | 4.11                            | 0.1       | 1.05 (0.004)          | 3.61 |
| 10. Ability to analyze data and other information                       | 3.95                                    | 0.07      | 4.4                             | 0.11      | 1.08 (0.001)          | 3.72 |
| 13. Learning laboratory techniques                                      | 4.06                                    | 0.1       | 4.51                            | 0.09      | 0.79 (0.008)          | 3.78 |
| 14. Ability to read and understand primary literature                   | 3.69                                    | 0.1       | 4.24                            | 0.11      | 0.92 (0.006)          | 3.58 |
| 15. Skill in how to give an effective oral presentation                 | 3.38                                    | 0.09      | 3.68                            | 0.19      | 0.52 (0.059)          | 3.43 |
| 16. Skill in science writing                                            | 3.64                                    | 0.1       | 4.07                            | 0.16      | 0.71 (0.004)          | 3.27 |
| <b>Development</b>                                                      |                                         |           |                                 |           |                       |      |
| 1. Clarification of a career path                                       | 3.34                                    | 0.1       | 3.68                            | 0.08      | 0.57 (0.022)          | 3.32 |
| 3. Tolerance for obstacles faced in the research process                | 3.8                                     | 0.08      | 4.19                            | 0.1       | 0.83 (0.008)          | 3.84 |
| 4. Readiness for more demanding research                                | 3.73                                    | 0.09      | 4.12                            | 0.11      | 0.75 (0.014)          | 3.78 |
| 17. Self-confidence                                                     | 3.48                                    | 0.09      | 4.03                            | 0.13      | 0.97 (0.003)          | 3.51 |
| 19. Learning to work independently                                      | 3.53                                    | 0.09      | 4.04                            | 0.12      | 0.94 (<0.001)         | 3.69 |
| 20. Becoming a part of a learning community                             | 3.7                                     | 0.07      | 4.19                            | 0.1       | 1.14 (<0.001)         | 3.61 |
